# Supplementary material for: Surface ionic states and structure of titanate nanotubes
Source: Royal Society of Chemistry journal article supplement (doi:10.1039/c5ra14323c), 2015-01-01
Supplement: c5ra14323c1.pdf [file c5ra14323c1.pdf]

## Surface ionic states and structure of titanate nanotubes

Sesha Vempati,<sup>a\*</sup> Fatma Kayaci,<sup>a,b</sup> Cagla Ozgit-Akgun,<sup>a,b</sup> Necmi Biyikli<sup>a,b</sup> and Tamer Uyar<sup>a,b\*</sup>

<sup>a</sup> UNAM-National Nanotechnology Research Center, Bilkent University, Ankara, 06800, Turkey.

E-mail: SV: svempati01@qub.ac.uk; TU: uyar@unam.bilkent.edu.tr

<sup>b</sup> Institute of Materials Science and Nanotechnology, Bilkent University, Ankara, 06800, Turkey

### Supplementary information

STab 1: Literature review of the preparation of zinc titanates.

| Type of reaction         | Compound(s)                                           | Temp (°C)             | Duration | Phase information/comment                                                            | Ref  |
|--------------------------|-------------------------------------------------------|-----------------------|----------|--------------------------------------------------------------------------------------|------|
| Citrate method           | Zinc titanate                                         | 720                   | 12h      | -                                                                                    | [1]  |
| Sol-gel                  | <i>c</i> -ZnTiO <sub>3</sub>                          | 700                   | 5h       | Rh-ZnTiO <sub>3</sub>                                                                | [2]  |
|                          | ZnTiO <sub>3</sub>                                    | 700                   | 2h       | Amorphous-ZnTiO <sub>3</sub> , Zn <sub>2</sub> TiO <sub>4</sub> , R-TiO <sub>2</sub> | [3]  |
|                          | Crystalline-ZnTiO <sub>3</sub>                        | 900                   | 2h       | Zn <sub>2</sub> TiO <sub>4</sub> , R-TiO <sub>2</sub>                                | [3]  |
|                          | <i>h</i> -ZnTiO <sub>3</sub>                          | 800                   | NA       | Zn <sub>2</sub> TiO <sub>4</sub> , R-TiO <sub>2</sub>                                | [4]  |
|                          | nanocrystalline ZnTiO <sub>3</sub>                    | 400                   |          | Amorphous                                                                            | [5]  |
|                          | <i>c</i> -ZnTiO <sub>3</sub>                          | 800                   | 3h       | R-TiO <sub>2</sub> , Zn <sub>2</sub> TiO <sub>4</sub> : 27.4, 42.7°                  | [5]  |
|                          | <i>c</i> -ZnTiO <sub>3</sub>                          | 900 W, μ-wave heating | 10 min   | Broad and low intensity peaks oriented in (311) plane                                | [5]  |
|                          | Rh-ZnTiO <sub>3</sub>                                 | 500                   | 1h       | <i>c</i> -ZnO, <i>c</i> -Zn <sub>2</sub> TiO <sub>4</sub>                            | [6]  |
| Sol-gel/Pechini          | ZnTiO <sub>3</sub>                                    | 800                   | 6h       | Zn <sub>2</sub> TiO <sub>4</sub> , R-TiO <sub>2</sub>                                | [7]  |
| Pechini                  | ZnTiO <sub>3</sub>                                    | 800                   | 6h       | R-TiO <sub>2</sub> , Zn <sub>2</sub> TiO <sub>4</sub>                                | [8]  |
| High energy ball milling | ZnTiO <sub>3</sub> , Zn <sub>2</sub> TiO <sub>4</sub> | -                     | 3h       | -                                                                                    | [9]  |
|                          | ZnTiO <sub>3</sub> , Zn <sub>2</sub> TiO <sub>4</sub> | -                     | 6h       | R-TiO <sub>2</sub>                                                                   | [9]  |
| Solid-state              | Perovskite ZnTiO <sub>3</sub>                         | 800                   | 12h      | Zn <sub>2</sub> TiO <sub>4</sub> , R-TiO <sub>2</sub>                                | [10] |
| Co-precipitation         | Zinc titanate                                         | 700                   | 2h       | Secondary phases                                                                     | [11] |

#### References

- [1] Chem. Eng. Sci., 1992, **47**, 1421–1431  
 [2] J. Mater. Sci. Lett., 2001, **20**, 573–575  
 [3] J. Sol-Gel Sci. Technol., 2005, **33**, 103–106  
 [4] Mater. Lett., 2005, **59**, 197–200  
 [5] J. Phys. Chem. Solids, 2007, **68**, 317–323  
 [6] J. Euro. Ceram. Soc., 2010, **30**, 947–961  
 [7] J. Cryst. Growth, 2002, **243**, 319–326  
 [8] Mater. Res. Bull., 2008, **43**, 1066–1073  
 [9] Physica E, 2006, **33**, 69–76  
 [10] Ceram. Int., 2004, **30**, 2183–2189  
 [11] Ind. Eng. Chem. Res., 1998, **37**, 1929–1933  
*c*-cubic; Rh-Rhombohedral; R-rutile;

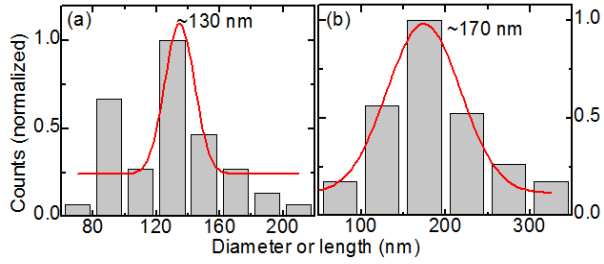

SFig 1: (a) diameter and (b) length of the grains observed for ZT14 after calcination.

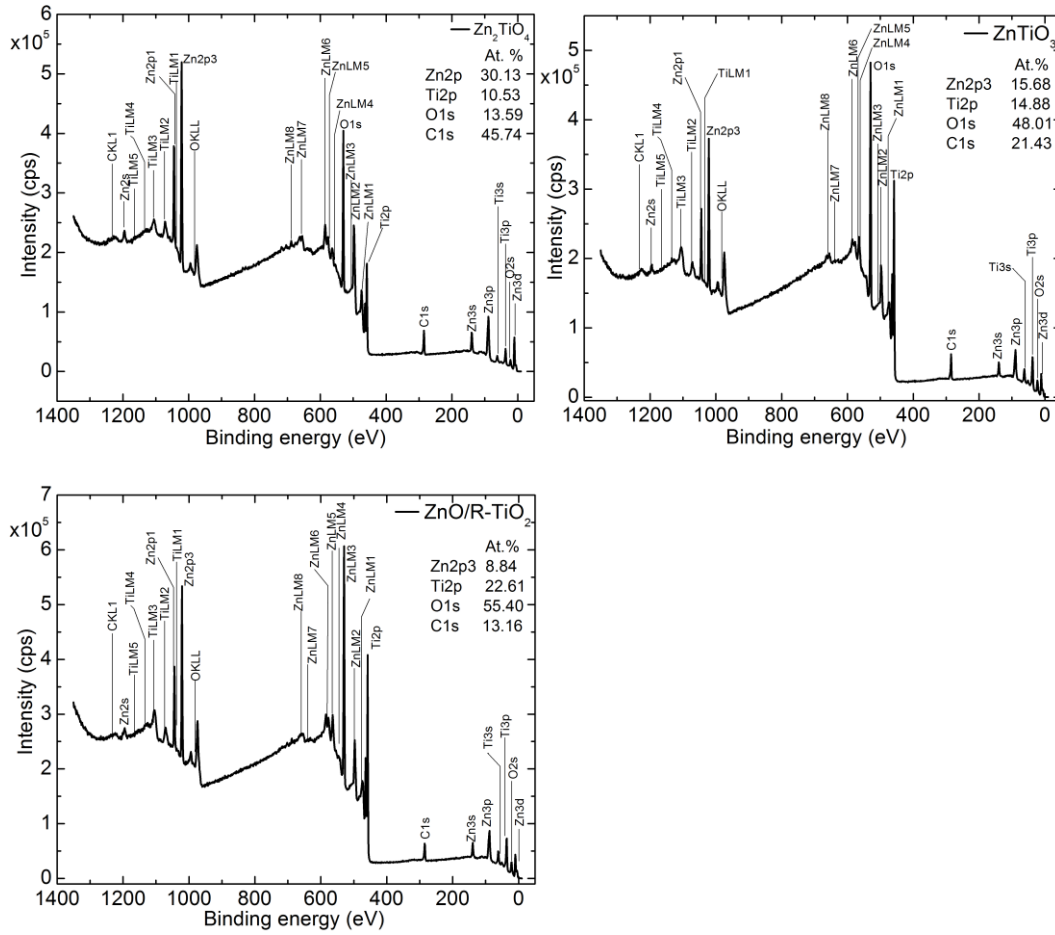

SFig 2: X-ray photoelectron spectra depicting survey of elements. The atomic percentages are shown on the image for the three compounds.
